# Supplementary material
Source: ML conference proceedings conference paper supplement (https://openaccess.thecvf.com/content/CVPR2024/html/Ferman_FaceLift_Semi-supervised_3D_CVPR_2024_paper.html)
Supplement: Supplementary file 3 [file Ferman_FaceLift_Semi-supervised_3D_CVPR_2024_supplemental.zip]

Archive with 4 entries (4 files):
- 7693_supp.mp4
- __MACOSX/._7693_supp.mp4
- 7693_supp.pdf
- __MACOSX/._7693_supp.pdf
